# Supplementary material for: Characterization of ten novel Ty1/copia-like retrotransposon families of the grapevine genome
Source: PubMed Central journal article supplement (PMC2576258; doi:10.1186/1471-2164-9-469), 2008-10-09
Supplement: 1471-2164-9-469-S2.pdf [file 1471-2164-9-469-S2.pdf]

| Reference element  | Rebase nomenclature | Element size (bp) | 5'LTR - 3' LTR (bp) | Internal domain (bp) | LTR identity % | Direct flanking repeat | LTR end dinucleotides | UTL region (bp) | Gag-pol (aa) | Location   |              |                   |
|--------------------|---------------------|-------------------|---------------------|----------------------|----------------|------------------------|-----------------------|-----------------|--------------|------------|--------------|-------------------|
|                    |                     |                   |                     |                      |                |                        |                       |                 |              | Chromosome | Scaffold N°  | NCBI accession n° |
| <b>Brand-B01</b>   | Copia-29_VV         | 5519              | 500-502             | 4517                 | 94.4           | aatat                  | TGTT/AACA             |                 |              | unknown    | scaffold_163 | CU459380          |
| <b>Cremant-B05</b> | Copia-30_VV         | 4809              | 245-244             | 4320                 | 99.2           | atata                  | TAAC/GTCA             | 35              | 1346         | chr11      | scaffold_118 | CU459335          |
| <b>Edel-B05</b>    | Copia-31_VV         | 4774              | 373-373             | 4028                 | 100            | ggagc                  | TGTT/TACA             | 39              | 1298         | chr8       | scaffold_23  | CU459240          |
| <b>Gans-B08</b>    | Copia-32_VV         | 4922              | 247-247             | 4428                 | 100            | gtagt                  | TGTT/TACA             |                 |              | chr12      | scaffold_78  | CU459295          |
| <b>Gentil-B05</b>  | Copia-33_VV         | 4251              | 297-297             | 3657                 | 99.7           | gttgt                  | TGTT/AAGA             |                 |              | chr9       | scaffold_33  | CU459250          |
| <b>Huben-B01</b>   | Copia-1_VV*         | 4944              | 206-206             | 4532                 | 100            | atata                  | TGTG/TTCA             |                 |              | chr14      | scaffold_21  | CU459238          |
| <b>Kastel-B06</b>  | Copia-18_VV*        | 4086              | 249-231             | 3606                 | 89.2           | gtaaa                  | TGTT/GTCA             |                 |              | chr5       | scaffold_67  | CU459284          |
| <b>Noble-AF04</b>  | Copia-3_VV*         | 5485              | 200-200             | 5085                 | 99.5           | gaagt                  | TGTT/TTCA             | 617             | 1486         | chr5       | scaffold_58  | CU459275          |
| <b>Rangen-B07</b>  | Copia-34_VV         | 5020              | 168-147             | 4705                 | 91.9           | aatgc                  | TGTT/AACA             |                 |              | chr19      | scaffold_35  | CU459252          |
| <b>Wintz-B01</b>   | Copia-35_VV         | 5281              | 291-291             | 4999                 | 99.3           | aaaac                  | TGTG/GTCA             |                 |              | chr2       | scaffold_140 | CU459357          |
